# Supplementary material for: Self-driven broadband photodetectors on flexible silicon nanowires substrate by forming a heterojunction with reduced graphene oxide
Source: Royal Society of Chemistry journal article supplement (doi:10.1039/d3tc04427k), 2024-01-01
Supplement: d3tc04427k1.pdf [file d3tc04427k1.pdf]

# **Self-driven broadband photodetectors on flexible silicon nanowires substrate by forming heterojunction with reduced graphene oxide**

Haiyuan Xin<sup>1</sup>, Shengyi Yang<sup>1\*</sup>, Ying Wang<sup>1</sup>, Muhammad Sulaman<sup>1</sup>,  
Zhenheng Zhang<sup>1</sup>, Zhenhua Ge<sup>1</sup>, Jinming Hu<sup>2</sup>, Shilu wang<sup>1</sup>, Bingsuo Zou<sup>3</sup>,  
Libin Tang<sup>4</sup>

<sup>1</sup>Beijing Key Lab of Nanophotonics and Ultrafine Optoelectronic Systems, School of Physics, Beijing Institute of Technology, Beijing 100081, P. R. China

<sup>2</sup>Centre for Artificial-Intelligence Nanophotonics, School of Optical-Electrical and Computer Engineering, University of Shanghai for Science and Technology, Shanghai, 200093, P. R. China

<sup>3</sup>School of Physical Science and Technology, Guangxi University, Nanning 530004, P. R. China

<sup>4</sup>Kunming Institute of Physics, Kunming 650223, P. R. China

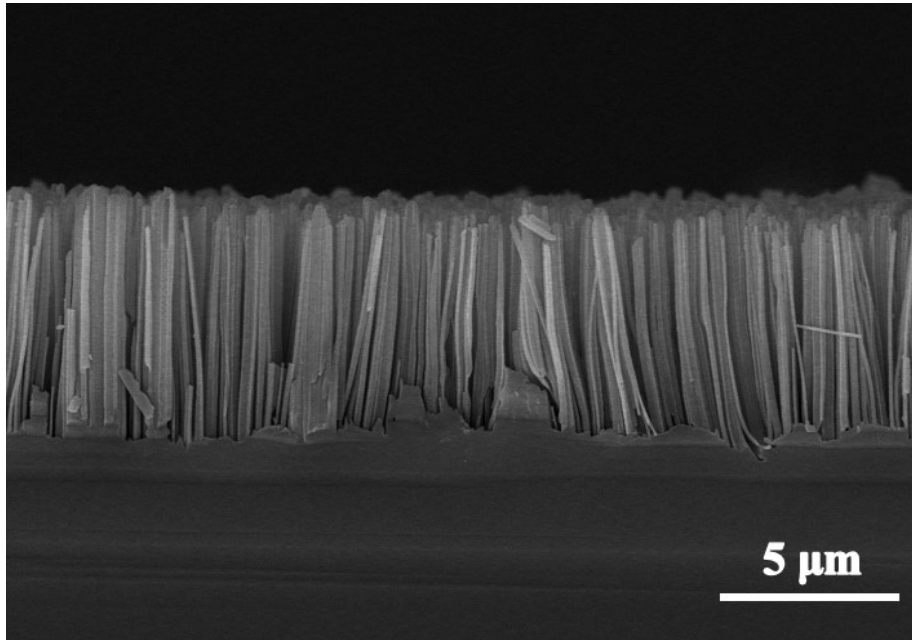

**Figure S1.** The SEM image of Si-NWs without coating rGO.

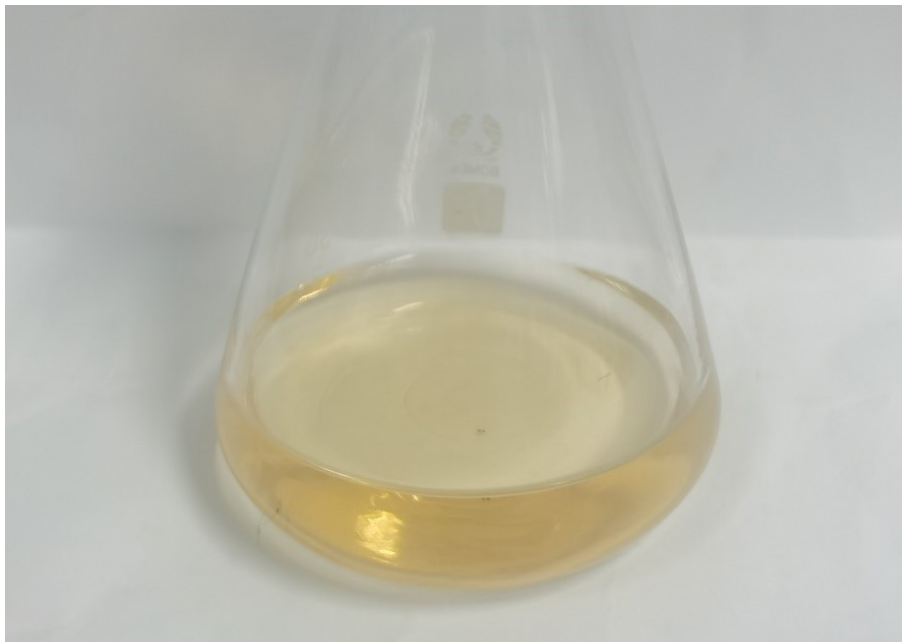

**Figure S2.** Photograph of GO suspension.

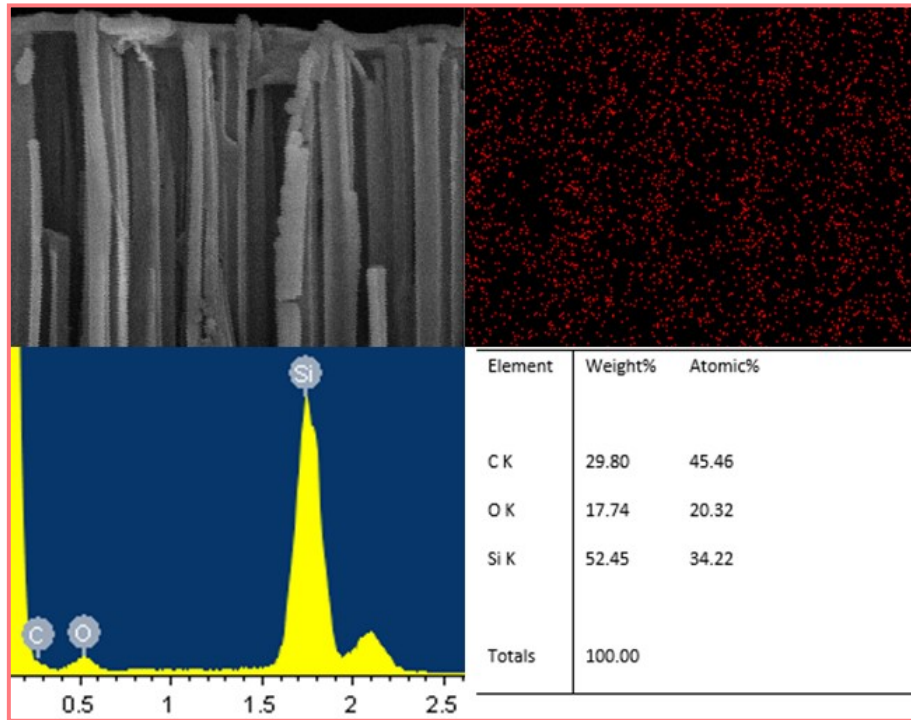

**Figure S3.** EDS spectra of Si-NWs/rGO structure.

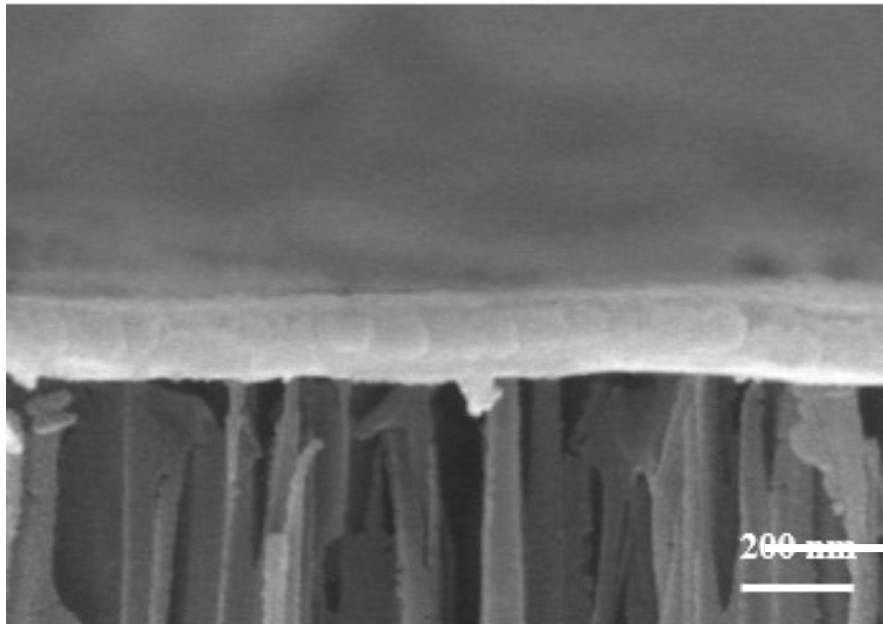

**Figure S4.** SEM image of rGO film.

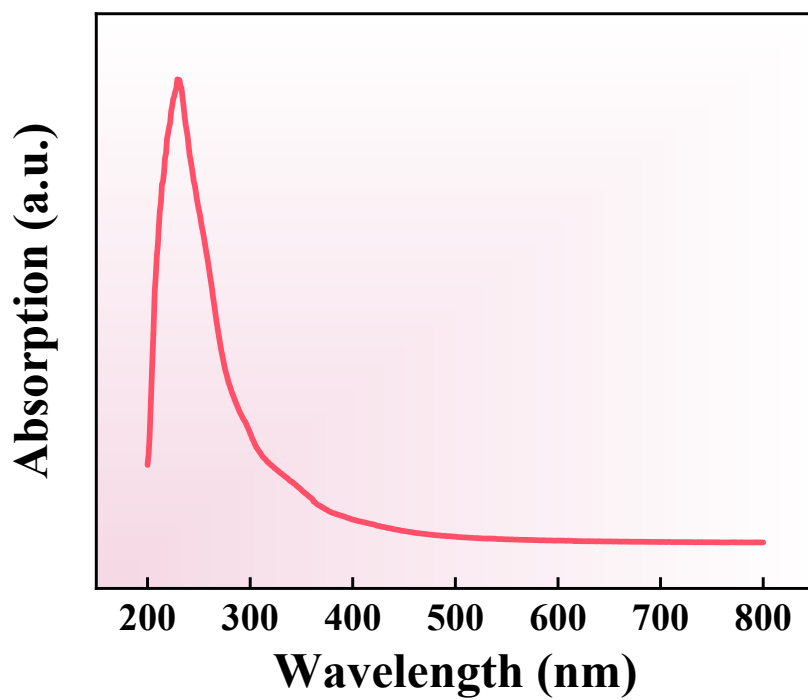

Figure S5. Absorption spectrum of GO dispersion.

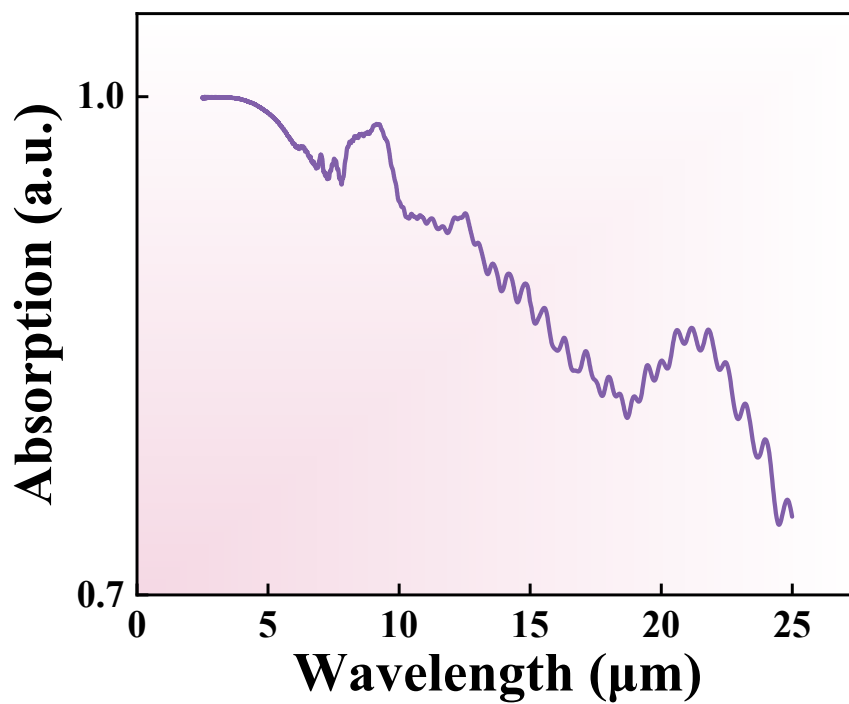

Figure S6. Absorption spectrum of the rGO film.

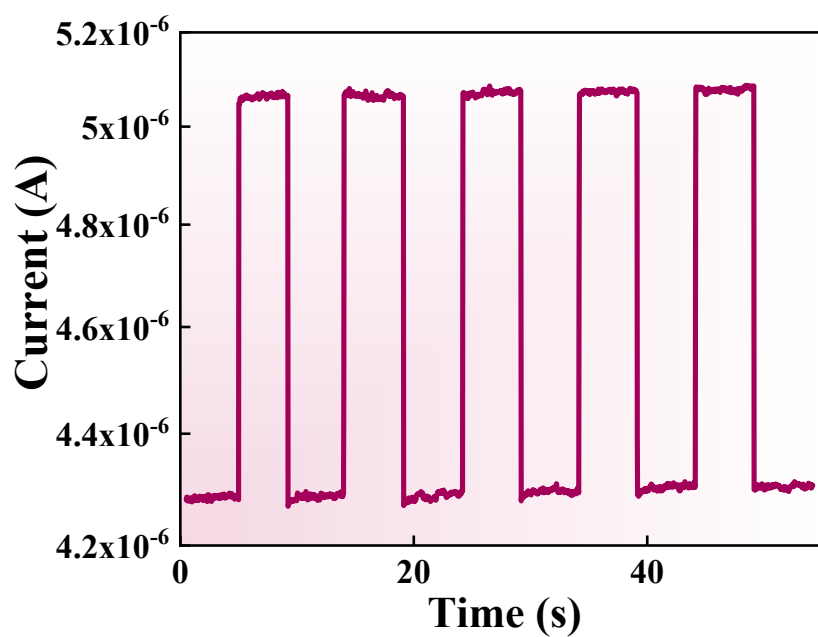

**Figure S7.** Photocurrent switching performance of the device measured under  $36.7 \mu\text{W}/\text{cm}^2$  980 nm illumination at -0.3 bias.

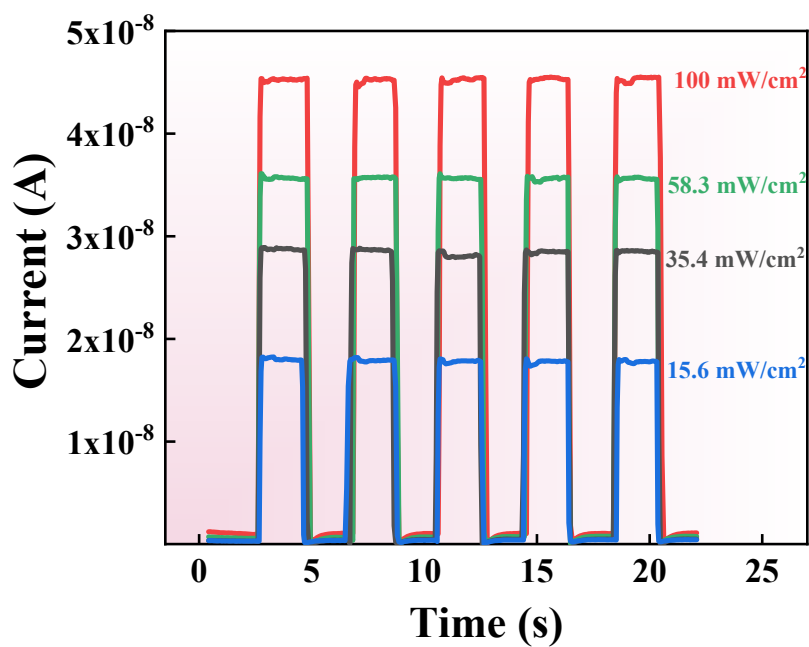

**Figure S8.** Photocurrent performance of the photodetector under 1550 nm illumination in different intensities.

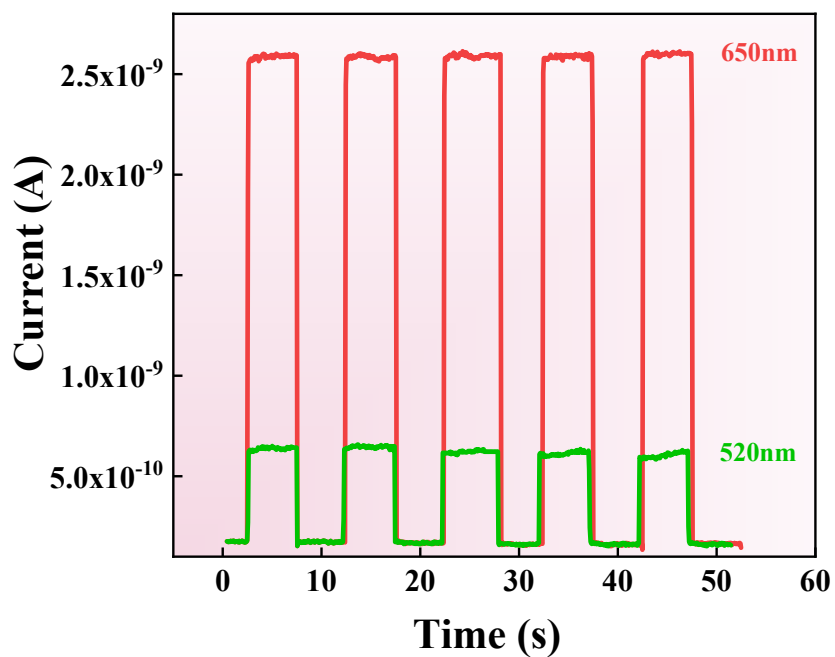

**Figure S9.** Photocurrent performance of the photodetector under  $10.2 \mu\text{W}/\text{cm}^2$  520 nm and  $10.6 \mu\text{W}/\text{cm}^2$  650nm illuminations, respectively.

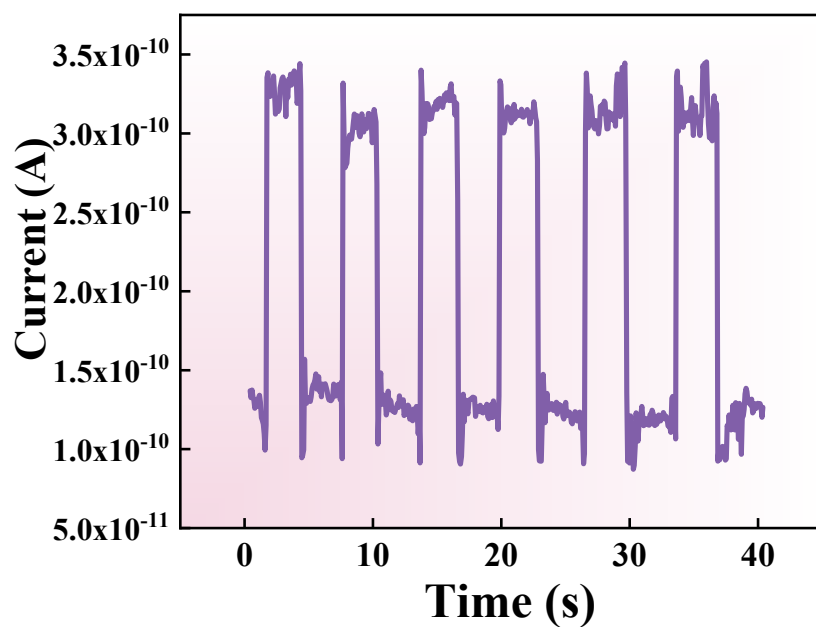

**Figure S10.** Photocurrent performance of the photodetector under  $4.5 \text{mW}/\text{cm}^2$   $10 \mu\text{m}$  illumination.

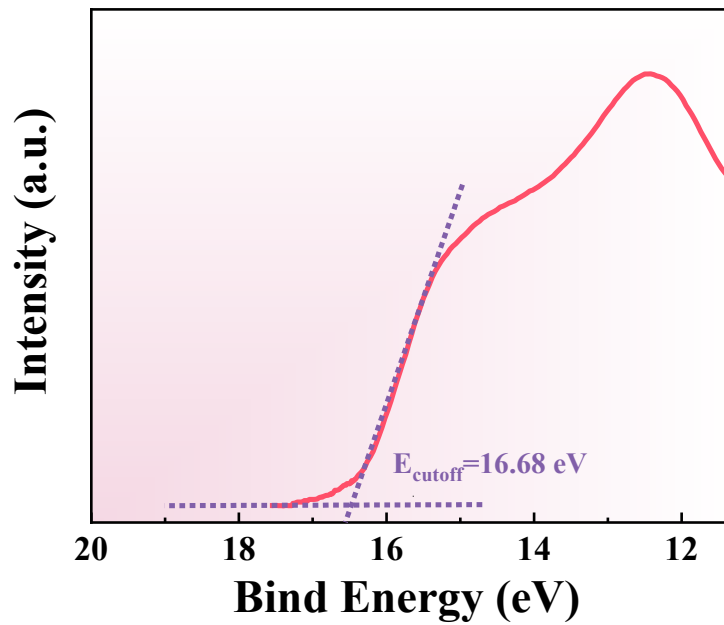

**Figure S11.** UPS spectra the secondary electron onset region for rGO film.

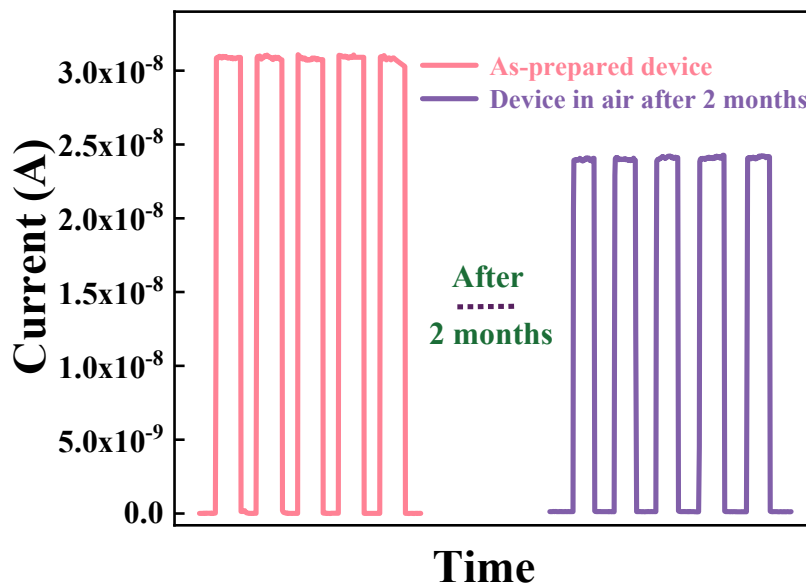

**Figure S12.** Stability comparison of Si-NWs/rGO heterojunction photodetector as-prepared and after storing in air (20%RH @ 20°C) after two months under  $1.9 \mu\text{W}/\text{cm}^2$  980 nm illumination.
